# Supplementary material for: 薬剤師が知っておくべき臓器別画像解析の基礎知識(11)2.関節分野(5)骨盤,股関節のMRI
Source: Royal Society of Chemistry journal article supplement (doi:10.1039/c4dt03365e), 2011-11-01
Supplement: c4dt03365e1.pdf [file c4dt03365e1.pdf]

## **Single-molecule magnet behavior in three cyano-bridged heterometallic Fe<sup>III</sup>-Ni<sup>II</sup> clusters**

Peng-Fei Zhuang, Yan-Juan Zhang, Hui Zheng, Cheng-Qi Jiao, Liang Zhao, Jun-Li Wang, Cheng He, Chun-Ying Duan, Tao Liu,\*

*State Key Laboratory of Fine Chemicals, Dalian University of Technology, Dalian, 116024,*

*China*

\* Corresponding author. Tel: +86-411-84986316; fax: +86-411-84986314

E-mail address: [liutao@dlut.edu.cn](mailto:liutao@dlut.edu.cn)

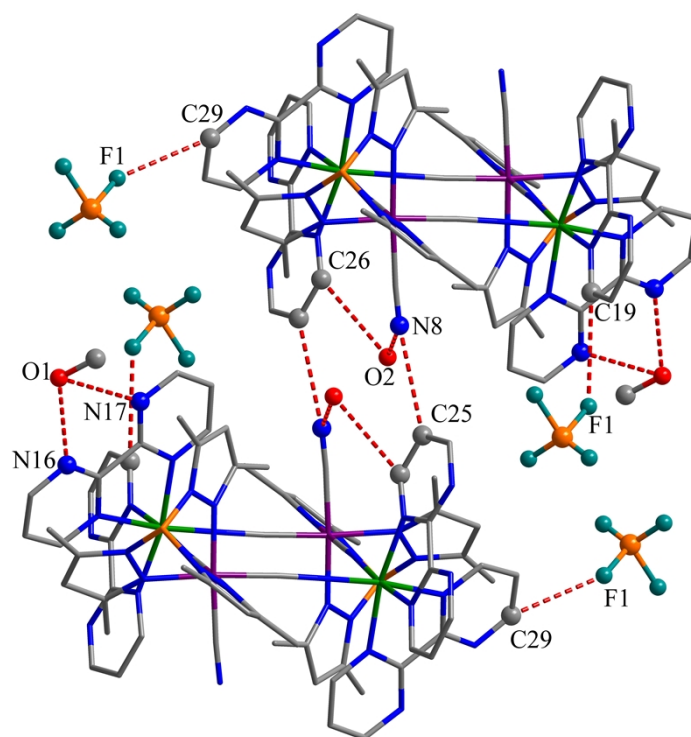

Figure S1. Packing diagram of **2**, the red dashed lines represent hydrogen bonding interactions.

Hydrogen atoms are omitted for clarity (Fe, violet, Ni, green, C, gray, N, blue, B, orange, O, red, F, teal).

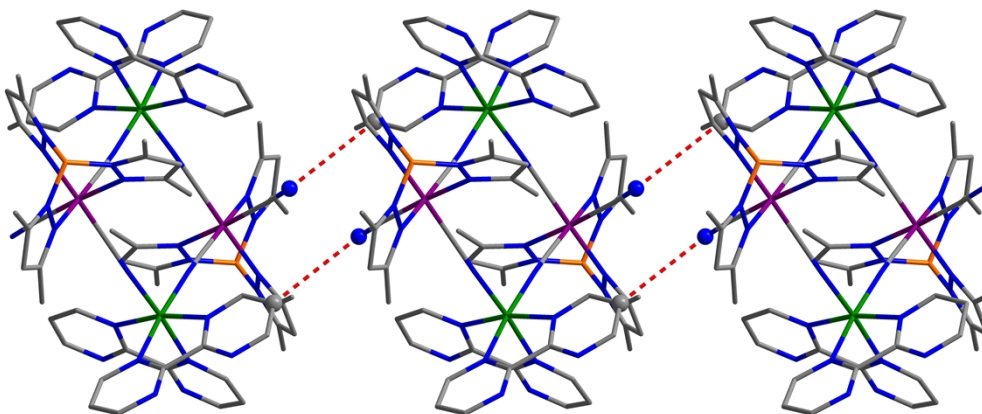

Figure S2. Crystal structure of 1D chain of **2**, the red dashed lines represent hydrogen bonding interactions. The anions, hydrogen atoms, methanol and water molecules are omitted for clarity (Fe, violet, Ni, green, C, gray, N, blue, B, orange).

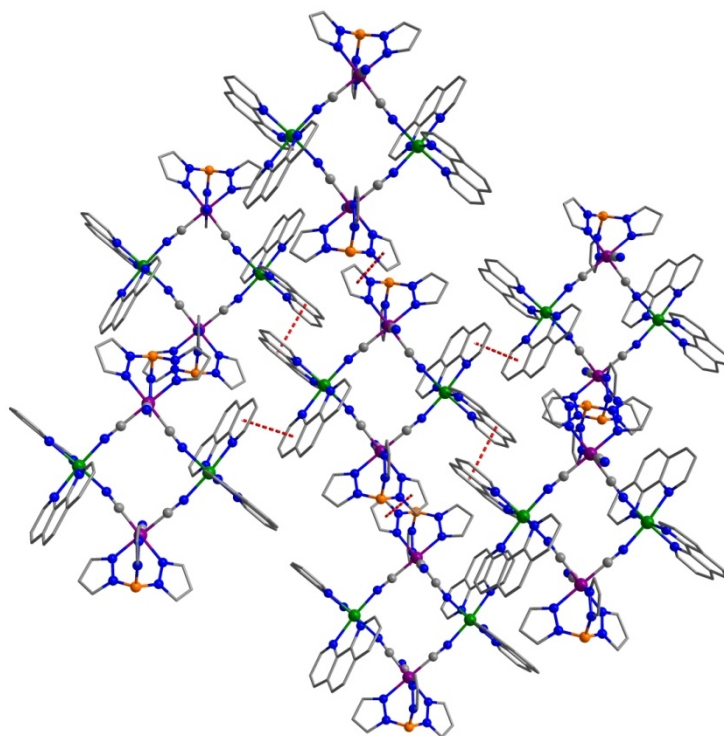

Figure S3. Packing diagram of **3**, the red dashed lines represent  $\pi$ - $\pi$  stacking of pyrazolyl rings, benzen rings, and pyridine rings between adjacent chains. The anions are omitted for clarity (Fe, violet, Ni, green, C, gray, N, blue, B, orange).

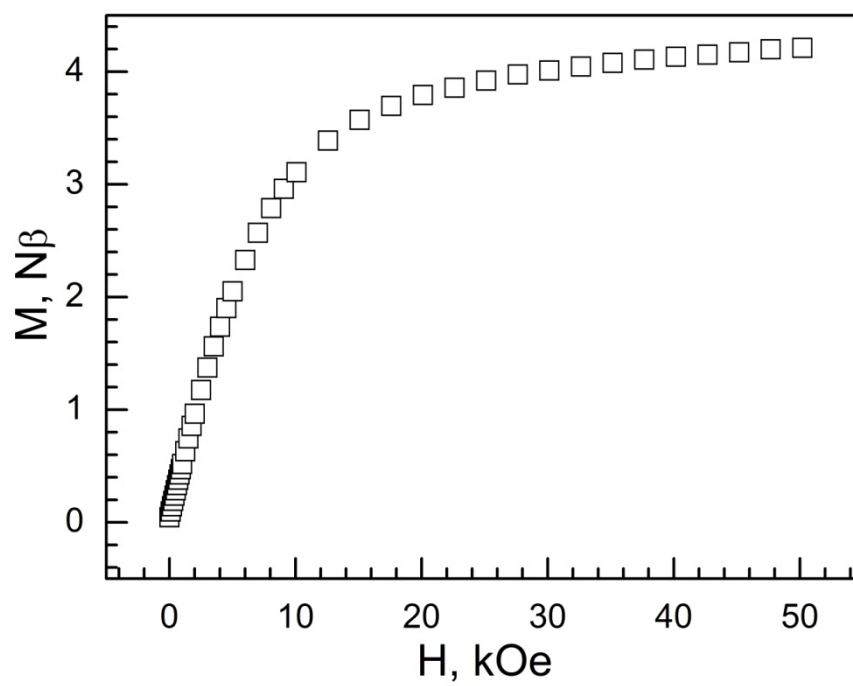

Figure S4. Field dependence of magnetization of **1** at 1.8 K.

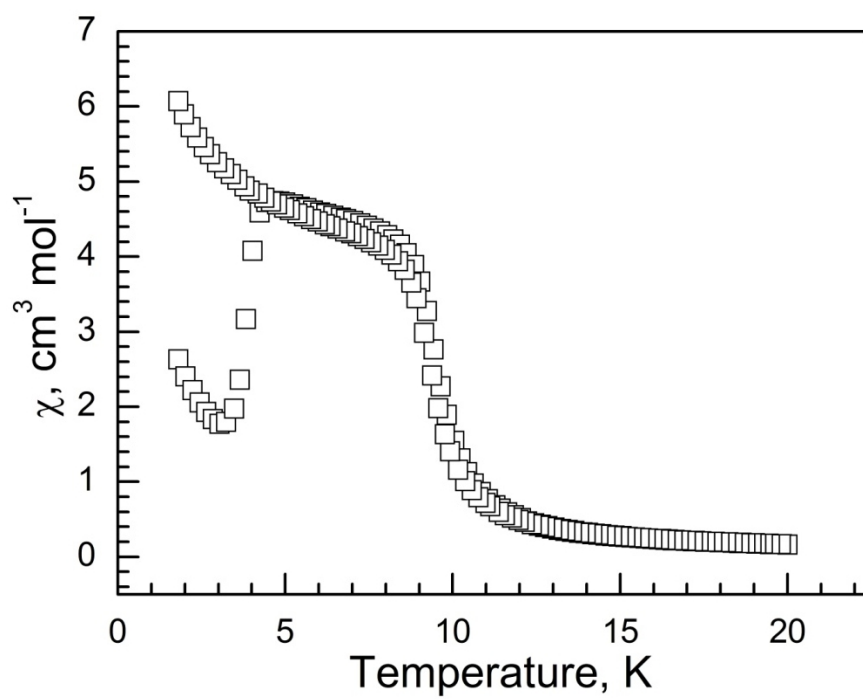

Figure S5. The irreversibility of ZFC and FC magnetization curves of **1** at 100 Oe.

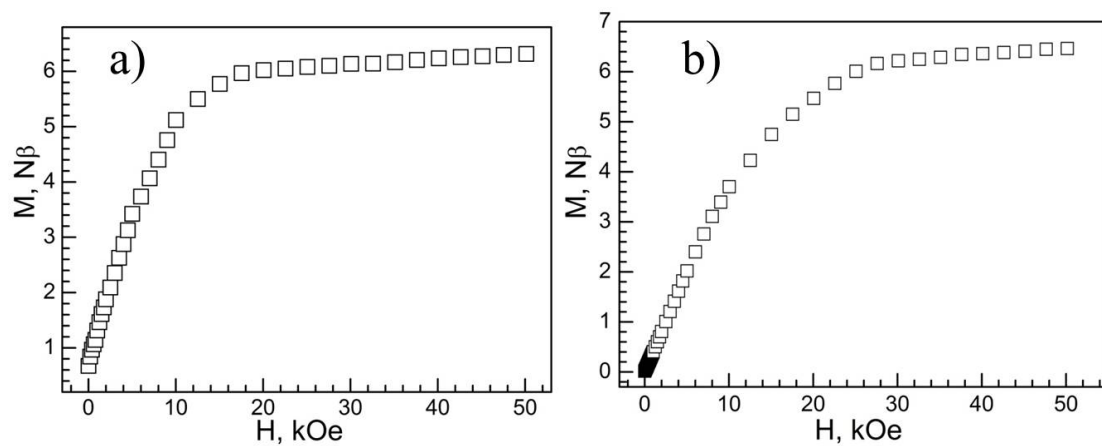

Figure S6. Field dependence of magnetization for **2** (a) and **3** (b) at 1.8 K.

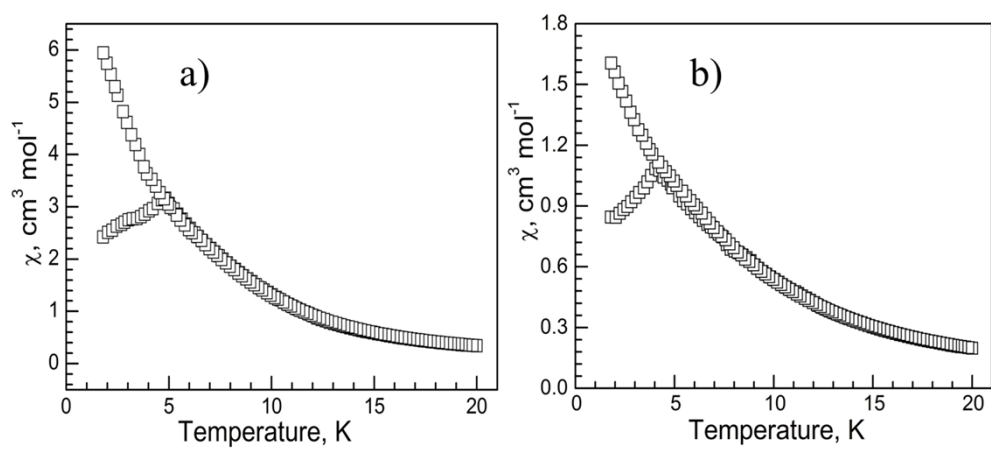

Figure S7. The irreversibility of ZFC and FC magnetization curves of **2** (a) and **3** (b) at 100 Oe.



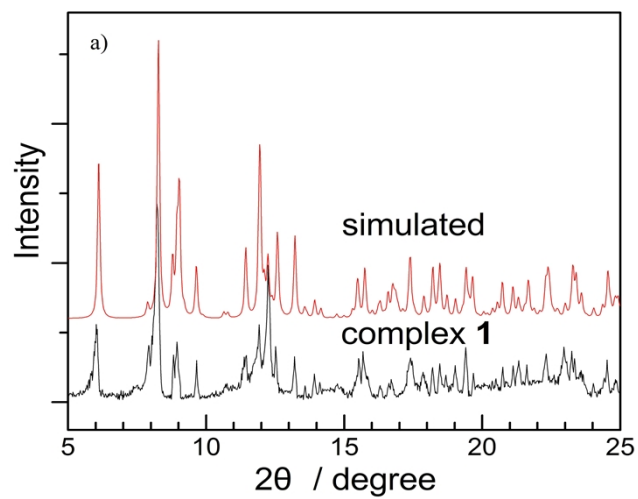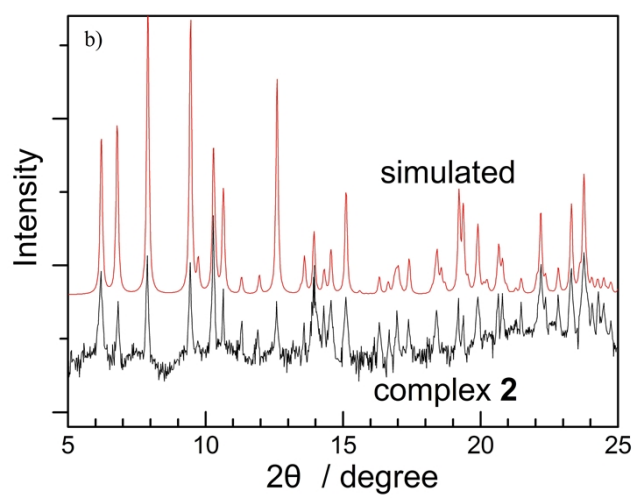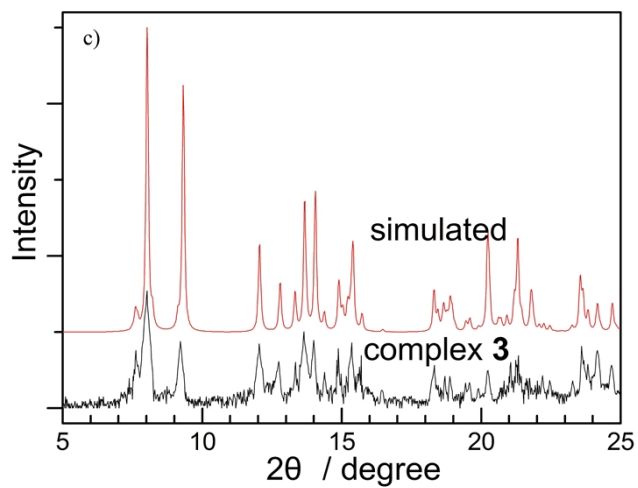

Figure S8. The experimental powder XRD pattern and the simulated XRD pattern of **1-3**.

**Table S1** Selected bond lengths (Å) and angles (°) for **1**.

---

| Complex <b>1</b>  |            |                       |            |
|-------------------|------------|-----------------------|------------|
| Fe(1)-C(15)       | 1.895(5)   | Ni(1)-N(9)            | 2.074(3)   |
| Fe(1)-C(14)       | 1.920(5)   | Ni(1)-N(9)#1          | 2.074(3)   |
| Fe(1)-C(13)       | 1.934(5)   | Ni(1)-N(12)#1         | 2.112(4)   |
| Fe(1)-N(6)        | 1.959(3)   | Ni(1)-N(12)           | 2.112(4)   |
| Fe(1)-N(7)        | 1.978(3)   | Ni(1)-N(14)#1         | 2.117(4)   |
| Fe(1)-N(4)        | 1.981(4)   | Ni(1)-N(14)           | 2.117(4)   |
|                   |            |                       |            |
| C(15)-Fe(1)-C(14) | 89.2(2)    | N(9)-Ni(1)-N(9)#1     | 180.00(17) |
| C(15)-Fe(1)-C(13) | 86.5(2)    | N(9)-Ni(1)-N(12)#1    | 89.94(14)  |
| C(14)-Fe(1)-C(13) | 84.64(18)  | N(9)#1-Ni(1)-N(12)#1  | 90.06(14)  |
| C(15)-Fe(1)-N(6)  | 91.69(19)  | N(9)-Ni(1)-N(12)      | 90.06(14)  |
| C(14)-Fe(1)-N(6)  | 177.08(17) | N(9)#1-Ni(1)-N(12)    | 89.94(14)  |
| C(13)-Fe(1)-N(6)  | 92.65(16)  | N(12)#1-Ni(1)-N(12)   | 180.000(1) |
| C(15)-Fe(1)-N(7)  | 90.34(18)  | N(9)-Ni(1)-N(14)#1    | 90.39(15)  |
| C(14)-Fe(1)-N(7)  | 92.74(17)  | N(9)#1-Ni(1)-N(14)#1  | 89.60(15)  |
| C(13)-Fe(1)-N(7)  | 175.89(17) | N(12)#1-Ni(1)-N(14)#1 | 90.23(15)  |
| N(6)-Fe(1)-N(7)   | 90.02(14)  | N(12)-Ni(1)-N(14)#1   | 89.77(15)  |
| C(15)-Fe(1)-N(4)  | 177.43(18) | N(9)-Ni(1)-N(14)      | 89.61(15)  |
| C(14)-Fe(1)-N(4)  | 91.7(2)    | N(9)#1-Ni(1)-N(14)    | 90.39(15)  |
| C(13)-Fe(1)-N(4)  | 96.02(16)  | N(12)#1-Ni(1)-N(14)   | 89.77(15)  |
| N(6)-Fe(1)-N(4)   | 87.49(15)  | N(12)-Ni(1)-N(14)     | 90.23(15)  |
| N(7)-Fe(1)-N(4)   | 87.22(15)  | N(14)#1-Ni(1)-N(14)   | 180.000(1) |

---

Symmetry transformations used to generate equivalent atoms for **1**: #1: -x, -y, -z+2.

**Table S2** Selected bond lengths (Å) and angles (°) for **2**.

---

| Complex <b>2</b>  |          |                    |          |
|-------------------|----------|--------------------|----------|
| Fe(1)–C(18)       | 1.924(8) | Ni(1)–N(9)         | 2.040(7) |
| Fe(1)–C(17)       | 1.933(8) | Ni(1)–N(10)        | 2.074(6) |
| Fe(1)–C(16)       | 1.948(8) | Ni(1)–N(7)#1       | 2.074(6) |
| Fe(1)–N(5)        | 1.995(6) | Ni(1)–N(14)        | 2.076(6) |
| Fe(1)–N(1)        | 2.003(6) | Ni(1)–N(11)        | 2.084(6) |
| Fe(1)–N(3)        | 2.011(6) | Ni(1)–N(15)        | 2.114(6) |
|                   |          |                    |          |
| C(18)–Fe(1)–C(17) | 83.8(3)  | N(9)–Ni(1)–N(10)   | 92.8(2)  |
| C(18)–Fe(1)–C(16) | 85.4(3)  | N(9)–Ni(1)–N(7)#1  | 93.2(2)  |
| C(17)–Fe(1)–C(16) | 88.6(3)  | N(10)–Ni(1)–N(7)#1 | 97.0(2)  |
| C(18)–Fe(1)–N(5)  | 93.4(3)  | N(9)–Ni(1)–N(14)   | 95.3(3)  |
| C(17)–Fe(1)–N(5)  | 177.0(3) | N(10)–Ni(1)–N(14)  | 169.5(2) |
| C(16)–Fe(1)–N(5)  | 92.4(3)  | N(7)#1–Ni(1)–N(14) | 89.1(2)  |
| C(18)–Fe(1)–N(1)  | 95.1(3)  | N(9)–Ni(1)–N(11)   | 89.1(2)  |
| C(17)–Fe(1)–N(1)  | 91.3(3)  | N(10)–Ni(1)–N(11)  | 78.6(2)  |
| C(16)–Fe(1)–N(1)  | 179.5(3) | N(7)#1–Ni(1)–N(11) | 175.2(2) |
| N(5)–Fe(1)–N(1)   | 87.7(2)  | N(14)–Ni(1)–N(11)  | 94.8(2)  |
| C(18)–Fe(1)–N(3)  | 173.9(3) | N(9)–Ni(1)–N(15)   | 173.6(2) |
| C(17)–Fe(1)–N(3)  | 91.7(3)  | N(10)–Ni(1)–N(15)  | 93.6(2)  |
| C(16)–Fe(1)–N(3)  | 90.3(3)  | N(7)#1–Ni(1)–N(15) | 86.3(2)  |
| N(5)–Fe(1)–N(3)   | 91.2(2)  | N(14)–Ni(1)–N(15)  | 78.3(3)  |
| N(1)–Fe(1)–N(3)   | 89.2(2)  | N(11)–Ni(1)–N(15)  | 92.0(2)  |

---

Symmetry transformations used to generate equivalent atoms for **2**: #1: -x+2, -y+2, -z+1.

**Table S3** Selected bond lengths (Å) and angles (°) for **3**

---

| Complex <b>3</b>  |            |                    |            |
|-------------------|------------|--------------------|------------|
| Fe(1)-C(12)       | 1.910(5)   | Ni(1)-N(9)         | 2.041(4)   |
| Fe(1)-C(11)       | 1.913(4)   | Ni(1)-N(8)#1       | 2.051(3)   |
| Fe(1)-C(10)       | 1.928(6)   | Ni(1)-N(13)        | 2.079(4)   |
| Fe(1)-N(3)        | 1.961(3)   | Ni(1)-N(10)        | 2.091(5)   |
| Fe(1)-N(1)        | 1.975(4)   | Ni(1)-N(12)        | 2.100(3)   |
| Fe(1)-N(5)        | 1.972(4)   | Ni(1)-N(11)        | 2.110(4)   |
|                   |            |                    |            |
| C(12)-Fe(1)-C(11) | 88.60(17)  | N(9)-Ni(1)-N(8)#1  | 91.02(14)  |
| C(12)-Fe(1)-C(10) | 87.7(2)    | N(9)-Ni(1)-N(13)   | 92.72(15)  |
| C(11)-Fe(1)-C(10) | 85.73(19)  | N(8)#1-Ni(1)-N(13) | 94.96(15)  |
| C(12)-Fe(1)-N(3)  | 90.52(15)  | N(9)-Ni(1)-N(10)   | 93.80(16)  |
| C(11)-Fe(1)-N(3)  | 177.65(17) | N(8)#1-Ni(1)-N(10) | 88.94(15)  |
| C(10)-Fe(1)-N(3)  | 92.06(17)  | N(13)-Ni(1)-N(10)  | 172.34(15) |
| C(12)-Fe(1)-N(1)  | 178.75(17) | N(9)-Ni(1)-N(12)   | 90.91(13)  |
| C(11)-Fe(1)-N(1)  | 92.09(16)  | N(8)#1-Ni(1)-N(12) | 173.81(15) |
| C(10)-Fe(1)-N(1)  | 93.36(18)  | N(13)-Ni(1)-N(12)  | 79.07(14)  |
| N(3)-Fe(1)-N(1)   | 88.83(14)  | N(10)-Ni(1)-N(12)  | 96.80(14)  |
| C(12)-Fe(1)-N(5)  | 91.46(16)  | N(9)-Ni(1)-N(11)   | 172.49(15) |
| C(11)-Fe(1)-N(5)  | 92.32(17)  | N(8)#1-Ni(1)-N(11) | 84.99(14)  |
| C(10)-Fe(1)-N(5)  | 177.90(16) | N(13)-Ni(1)-N(11)  | 93.96(15)  |
| N(3)-Fe(1)-N(5)   | 89.88(14)  | N(10)-Ni(1)-N(11)  | 79.79(16)  |
| N(1)-Fe(1)-N(5)   | 87.47(15)  | N(12)-Ni(1)-N(11)  | 93.71(13)  |

---

Symmetry transformations used to generate equivalent atoms for **3**: #1: -x+2, -y+1, -z+1.

**Table S4** Crystal data and structure refinement for complexes **1-3**

| Complex                                                                     | <b>1</b>                                                                           | <b>2</b>                                                                                                                     | <b>3</b>                                                                                                                       |
|-----------------------------------------------------------------------------|------------------------------------------------------------------------------------|------------------------------------------------------------------------------------------------------------------------------|--------------------------------------------------------------------------------------------------------------------------------|
| chemical formula                                                            | C <sub>59</sub> H <sub>76</sub> B <sub>2</sub> NiFe <sub>2</sub> N <sub>30</sub> O | C <sub>70</sub> H <sub>80</sub> B <sub>4</sub> F <sub>8</sub> Fe <sub>2</sub> N <sub>34</sub> Ni <sub>2</sub> O <sub>4</sub> | C <sub>72</sub> H <sub>56</sub> B <sub>2</sub> Cl <sub>2</sub> Fe <sub>2</sub> N <sub>26</sub> Ni <sub>2</sub> O <sub>10</sub> |
| formula weight                                                              | 1413.44                                                                            | 1885.92                                                                                                                      | 1766.99                                                                                                                        |
| crystal system                                                              | Triclinic                                                                          | Triclinic                                                                                                                    | Triclinic                                                                                                                      |
| space group                                                                 | <i>P</i> -1                                                                        | <i>P</i> -1                                                                                                                  | <i>P</i> -1                                                                                                                    |
| <i>a</i> /Å                                                                 | 11.9157(5)                                                                         | 11.365(3)                                                                                                                    | 13.4477(8)                                                                                                                     |
| <i>b</i> /Å                                                                 | 16.0385(5)                                                                         | 13.635(3)                                                                                                                    | 13.8536 (8)                                                                                                                    |
| <i>c</i> /Å                                                                 | 21.0439(7)                                                                         | 14.687(3)                                                                                                                    | 13.9678(11)                                                                                                                    |
| <i>α</i> /deg                                                               | 107.848(2)                                                                         | 104.044(16)                                                                                                                  | 118.140(4)                                                                                                                     |
| <i>β</i> /deg                                                               | 96.552(2)                                                                          | 91.199(14)                                                                                                                   | 114.968(4)                                                                                                                     |
| <i>γ</i> /deg                                                               | 105.634(2)                                                                         | 99.696(15)                                                                                                                   | 91.022(4)                                                                                                                      |
| <i>V</i> /Å <sup>3</sup>                                                    | 3600.6(2)                                                                          | 2171.8(9)                                                                                                                    | 2002.1(2)                                                                                                                      |
| <i>T</i> /K                                                                 | 296(2)                                                                             | 296(2)                                                                                                                       | 296(2)                                                                                                                         |
| <i>ρ</i> /g cm <sup>-3</sup>                                                | 1.290                                                                              | 1.413                                                                                                                        | 1.464                                                                                                                          |
| <i>μ</i> (Mo Kα)/mm <sup>-1</sup>                                           | 0.717                                                                              | 0.838                                                                                                                        | 0.958                                                                                                                          |
| <i>θ</i> range                                                              | 1.82° ≤ <i>θ</i> ≤ 25.00°                                                          | 1.82° ≤ <i>θ</i> ≤ 25.00°                                                                                                    | 1.73° ≤ <i>θ</i> ≤ 25.00°                                                                                                      |
| limiting indices                                                            | -14 ≤ <i>h</i> ≤ 10, -18 ≤ <i>k</i> ≤ 19, -25 ≤ <i>l</i> ≤ 25                      | -13 ≤ <i>h</i> ≤ 12, -16 ≤ <i>k</i> ≤ 16, -17 ≤ <i>l</i> ≤ 14                                                                | -15 ≤ <i>h</i> ≤ 15, -16 ≤ <i>k</i> ≤ 15, -13 ≤ <i>l</i> ≤ 16                                                                  |
| reflns collected                                                            | 24942                                                                              | 14637                                                                                                                        | 11802                                                                                                                          |
| unique collected                                                            | 12673                                                                              | 7630                                                                                                                         | 7033                                                                                                                           |
| <i>R</i> <sub>int</sub>                                                     | 0.0356                                                                             | 0.0525                                                                                                                       | 0.0326                                                                                                                         |
| Goodness-of-fit on <i>F</i> <sup>2</sup>                                    | 1.059                                                                              | 1.083                                                                                                                        | 0.936                                                                                                                          |
| <i>R</i> <sub>1</sub> , <i>wR</i> <sub>2</sub> ( <i>I</i> > 2σ( <i>I</i> )) | 0.0624, 0.1921                                                                     | 0.0918, 0.2473                                                                                                               | 0.0538, 0.1471                                                                                                                 |
| <i>R</i> <sub>1</sub> , <i>wR</i> <sub>2</sub> ( <i>all data</i> )          | 0.0877, 0.2086                                                                     | 0.1144, 0.2574                                                                                                               | 0.0828, 0.1637                                                                                                                 |
